# Supplementary material for: Single-cell atlas of hepatic T cells reveals expansion of liver-resident naive-like CD4+ T cells in primary sclerosing cholangitis
Source: PubMed Central journal article supplement — J Hepatol. 2021 Aug;75(2):414–23. doi: 10.1016/j.jhep.2021.03.016 (PMC8310924; doi:10.1016/j.jhep.2021.03.016), 2021-08
Supplement: mmc2.pdf [file mmc2.pdf]

## Journal of Hepatology

### CTAT methods

Tables for a “Complete, Transparent, Accurate and Timely account” (CTAT) are now mandatory for all revised submissions. The aim is to enhance the reproducibility of methods.

- Only include the parts relevant to your study
- Refer to the CTAT in the main text as ‘Supplementary CTAT Table’
- Do not add subheadings
- Add as many rows as needed to include all information
- Only include one item per row

**If the CTAT form is not relevant to your study, please outline the reasons why:**

|  |
|--|
|  |
|--|

#### 1.1 Antibodies

| Name     | Citation | Supplier  | Cat no. | Clone no. |
|----------|----------|-----------|---------|-----------|
| CD103    |          | Biologend | 350218  | Ber-ACT8  |
| CD127    |          | Biologend | 351326  | A019D5    |
| CD160    |          | Biologend | 341210  | BY55      |
| CD161    |          | Biologend | 339904  | HP-3G10   |
| CD183    |          | Biologend | 353732  | G025H7    |
| CD194    |          | Biologend | 359410  | L291H4    |
| CD196    |          | Biologend | 353406  | G034E3    |
| CD197    |          | Biologend | 353218  | G043H7    |
| CD223    |          | Biologend | 369304  | 11C3C65   |
| CD25     |          | Biologend | 302630  | BC96      |
| CD27     |          | Biologend | 302816  | O323      |
| CD272    |          | Biologend | 344511  | MIH26     |
| CD279    |          | Biologend | 329924  | EH12.2H7  |
| CD28     |          | Biologend | 302926  | CD28.2    |
| CD3      |          | Biologend | 317336  | OKT3      |
| CD39     |          | Biologend | 328212  | A1        |
| CD4      |          | Biologend | 317426  | OKT4      |
| CD4      |          | Biologend | 300548  | RPA-T4    |
| CD45     |          | Biologend | 304048  | HI30      |
| CD45RA   |          | Biologend | 304138  | HI100     |
| CD49a    |          | Biologend | 328312  | TS2/7     |
| CD49b    |          | Biologend | 359619  | P1E6-C5   |
| CD57     |          | Biologend | 359619  | HNK-1     |
| CD62L    |          | Biologend | 304843  | Clo       |
| CD69     |          | Biologend | 310926  | FN50      |
| CD73     |          | Biologend | 344004  | AD2       |
| CD8      |          | Biologend | 301028  | HIT8a     |
| CD8      |          | Biologend | 300930  | HIT8a     |
| HLA-DR   |          | Biologend | 307604  | L243      |
| TCRVa7.2 |          | Biologend | 351708  | 3C10      |
| TCRgd    |          | BD        | 655410  | 11F2      |
| CD25     |          | Biologend | 302643  | BC96      |

# JOURNAL OF HEPATOLOGY

|        |  |              |           |            |
|--------|--|--------------|-----------|------------|
| CD127  |  | Biologend    | 351352    | A019D5     |
| CD194  |  | Biologend    | 359423    | L291H4     |
| CD183  |  | Biologend    | 353745    | G025H7     |
| CD279  |  | Biologend    | 329955    | EH12.2H7   |
| CD223  |  | Biologend    | 369333    | 11C3C65    |
| CD152  |  | Biologend    | 369619    | BNI3       |
| TIGIT  |  | Biologend    | 372725    | A15153G    |
| CD4    |  | Biologend    | 344649    | SK3        |
| CD8    |  | Biologend    | 344751    | SK1        |
| HLA-DR |  | Biologend    | 307659    | L243       |
| TCRgd  |  | Biologend    | 331229    | B1         |
| CD56   |  | Biologend    | 362557    | 5.1H11     |
| CD314  |  | Biologend    | 320835    | 1D11       |
| CD45RA |  | Biologend    | 304157    | HI100      |
| CD197  |  | Biologend    | 353247    | G043H7     |
| CD49b  |  | Biologend    | 359311    | P1E6-C5    |
| CD196  |  | Biologend    | 353401    | G034E3     |
| TCRab  |  | Biologend    | 306702    | IP26       |
| CD366  |  | Biologend    | 345001    | F38-2E2    |
| IL-17A |  | Biologend    | 512301    | BL168      |
| CD45   |  | Biologend    | 368502    | 2D1        |
| CD57   |  | Biologend    | 359602    | HNK-1      |
| CD45RA |  | LifeSpan Bio | LSC389880 | PTPRC/1131 |
| CD4    |  | DAKO         | MA5-12259 | 4B12       |

## 1.2 Cell lines

| Name | Citation | Supplier | Cat no. | Passage no. | Authentication test method |
|------|----------|----------|---------|-------------|----------------------------|
|      |          |          |         |             |                            |

## 1.3 Organisms

| Name | Citation | Supplier | Strain | Sex | Age | Overall n number |
|------|----------|----------|--------|-----|-----|------------------|
|      |          |          |        |     |     |                  |

## 1.4 Sequence based reagents

| Name      | Barcode-Sequence | Oligo-Sequence                                                                            | Supplier                 |
|-----------|------------------|-------------------------------------------------------------------------------------------|--------------------------|
| CD196-ADT | CAAAAG           | Biotin-<br>CCTTGGCACCCGAGAATTCCAC<br>AAAAGBAAAAAAAAAAAAAAAAAAAA<br>AAAAAAAAAAAAAAAAAA*A*A | Biomers<br>(Custom made) |
| TCRgd-ADT | CAACTA           | Biotin-<br>CCTTGGCACCCGAGAATTCCAC<br>AACTABAAAAAAAAAAAAAAAAAAAA<br>AAAAAAAAAAAAAAAAAA*A*A | Biomers<br>(Custom made) |

|            |        |                                                                                           |                          |
|------------|--------|-------------------------------------------------------------------------------------------|--------------------------|
| CD366-ADT  | CACCGG | Biotin-<br>CCTTGGCACCCGAGAATTCCAC<br>ACCGGBAAAAAAAAAAAAAAAAAAAA<br>AAAAAAAAAAAAAAAAAA*A*A | Biomers<br>(Custom made) |
| IL17-A-ADT | CACGAT | Biotin-<br>CCTTGGCACCCGAGAATTCCAC<br>ACGATBAAAAAAAAAAAAAAAAAAAA<br>AAAAAAAAAAAAAAAAAA*A*A | Biomers<br>(Custom made) |
| CD45-ADT   | CAGGCG | Biotin-<br>CCTTGGCACCCGAGAATTCCAC<br>AGGCGBAAAAAAAAAAAAAAAAAAAA<br>AAAAAAAAAAAAAAAAAA*A*A | Biomers<br>(Custom made) |
| CD57-ADT   | CATGGC | Biotin-<br>CCTTGGCACCCGAGAATTCCAC<br>ATGGCBAAAAAAAAAAAAAAAAAAAA<br>AAAAAAAAAAAAAAAAAA*A*A | Biomers<br>(Custom made) |

## 1.5 Biological samples

| Description                              | Source                                                                               | Identifier                                           |
|------------------------------------------|--------------------------------------------------------------------------------------|------------------------------------------------------|
| Peripheral Blood                         | University Medical Center<br>Hamburg-Eppendorf, UKE,<br>Hamburg, Germany             | Referred to as<br>"Blood" in<br>patient tables       |
| Cirrhotic explant liver tissue           | University Medical Center<br>Hamburg-Eppendorf, UKE,<br>Hamburg, Germany             | Referred to as<br>"Liver" in patient<br>tables       |
| Non-cirrhotic CCA resection<br>margin    | University Medical Center<br>Hamburg-Eppendorf, UKE,<br>Hamburg, Germany             | Referred to as<br>"Liver early" in<br>patient tables |
| Non-cirrhotic tumour resection<br>margin | Asklepios Hospital Barmbek,<br>Semmelweis University of Medicine<br>Hamburg, Germany | Referred to as<br>"LRM liver" in<br>patient tables   |

## 1.6 Deposited data

| Name of repository | Identifier   | Link                                                                                                          |
|--------------------|--------------|---------------------------------------------------------------------------------------------------------------|
| EBI ArrayExpress   | E-MTAB-10143 | <a href="https://www.ebi.ac.uk/arrayexpress/experiments/">https://www.ebi.ac.uk/arrayexpress/experiments/</a> |

## 1.7 Software

| Software name         | Manufacturer                  | Version        |
|-----------------------|-------------------------------|----------------|
| GraphPad Prism        | GraphPad San Diego, USA       | Versions 6 & 8 |
| BD FACS Diva Software | BD Biosciences, USA           | Version 8      |
| FlowJo                | BD Biosciences, USA           | Version 10.6.2 |
| R                     | The R Foundation, Austria     | Version 3.6.2  |
| CellRanger            | 10x Genomics, USA             | Version 3.0.2  |
| CellRanger-Atac       | 10x Genomics, USA             | Version 1.2.0  |
| CellRanger-VDJ        | 10x Genomics, USA             | Version 3.1.0  |
| GREAT                 | Stanford University, USA      | Version 4.0.4  |
| HOMER                 | University of California, USA | Version 4.11   |

**1.8 Other (e.g. drugs, proteins, vectors etc.)**

|  |  |  |
|--|--|--|
|  |  |  |
|  |  |  |

**1.9 Please provide the details of the corresponding methods author for the manuscript:**

Tobias Poch  
I. Department of Medicine; University Medical Center Hamburg-Eppendorf  
Martinistraße 52; 20246 Hamburg, Germany  
Phone: (49)-40-7410-52495  
Fax: (49)-40-7410-58014  
Email: t.poch@uke.de

**2.0 Please confirm for randomised controlled trials all versions of the clinical protocol are included in the submission. These will be published online as supplementary information.**

|  |
|--|
|  |
|--|
